# Supplementary material for: EDIL3 is a potential prognostic biomarker that correlates with immune infiltrates in gastric cancer
Source: PeerJ journal article supplement (doi:10.7717/peerj.15559), 2023-08-09
Supplement: Raw_data_1.zip [file Raw_data_1.zip]

## Sheet: Fig 1D mRNA
Tumor	Adjacent non-neoplastic
0.420448	0.021051
1.18921	0.157127
0.323088	0.444421
0.193446	0.020054
0.219151	0.248273
0.262429	0.037163
0.271684	0.023519
0.29937	0.004044
0.203063	0.042689
0.320856	0.673617
0.175556	0.007442
1.68179	0.098755
0.30566	0.429283
0.071298	0.000838
0.03082	0.184284
0.020617	0.063813
1.28343	0.013888
0.077482	0.007922
0.004613	0.163799
0.179244	0.000531

## Sheet: Fig 1E Protein
Tumor	Adjacent non-neoplastic
0.725112	0.568755
1.61387	1.65758
0.925732	1.14684
1.08023	0.501958
0.784059	0.812964
1.18902	0.847252
1.11226	0.707446
1.41354	0.899067
1.18029	0.84103
1.15571	1.47201
0.988513	0.105039
2.6156	1.54981
0.680153	0.721476
0.801534	0.255615
0.643998	0.79136
0.679342	0.86527
1.60931	1.08164
0.976325	0.50595
0.262082	0.645242
0.776364	0.12192

## Sheet: Fig 2A and Table 1
Status	os	EDIL3	Gender	Age	size	differentiation	Lymph metastasis	Serosal invasion	pTNM stage
Live	47.8357	Positive	Female	>60	≤5cm	Well/moderate	No	Ngative	Ⅰ-Ⅱ
dead	28.1561	Negative	Female	>60	≤5cm	Well/moderate	No	Ngative	Ⅰ-Ⅱ
Live	31.9671	Positive	Male	>60	>5cm	Well/moderate	No	Ngative	Ⅰ-Ⅱ
dead	31.77	Positive	Male	>60	>5cm	Well/moderate	No	Ngative	Ⅰ-Ⅱ
dead	45.9959	Positive	Female	>60	>5cm	Well/moderate	No	Ngative	Ⅰ-Ⅱ
Live	72.6201	Negative	Male	>60	≤5cm	Well/moderate	No	Positive	Ⅰ-Ⅱ
Live	43.3676	Negative	Female	>60	≤5cm	Well/moderate	No	Positive	Ⅰ-Ⅱ
dead	10.6776	Positive	Female	>60	≤5cm	Well/moderate	No	Positive	Ⅰ-Ⅱ
Live	31.0801	Negative	Male	≤60	≤5cm	Well/moderate	Yes	Ngative	Ⅰ-Ⅱ
Live	30.6858	Negative	Male	≤60	≤5cm	Well/moderate	Yes	Ngative	Ⅰ-Ⅱ
Live	88.5359	Positive	Male	>60	≤5cm	Well/moderate	Yes	Ngative	Ⅰ-Ⅱ
Live	36.1068	Positive	Female	>60	≤5cm	Well/moderate	Yes	Ngative	Ⅰ-Ⅱ
dead	43.3676	Negative	Female	≤60	>5cm	Well/moderate	Yes	Ngative	Ⅰ-Ⅱ
dead	39.9507	Positive	Female	>60	>5cm	Well/moderate	Yes	Ngative	Ⅰ-Ⅱ
dead	15.77	Positive	Male	>60	≤5cm	Well/moderate	Yes	Positive	Ⅰ-Ⅱ
dead	29.2074	Negative	Male	≤60	≤5cm	Poor/undifferentiation	No	Ngative	Ⅰ-Ⅱ
Live	46.9815	Negative	Female	≤60	≤5cm	Poor/undifferentiation	No	Ngative	Ⅰ-Ⅱ
Live	46.1273	Negative	Female	≤60	≤5cm	Poor/undifferentiation	No	Ngative	Ⅰ-Ⅱ
Live	77.9055	Negative	Male	>60	≤5cm	Poor/undifferentiation	No	Ngative	Ⅰ-Ⅱ
Live	95.9281	Positive	Male	>60	≤5cm	Poor/undifferentiation	No	Ngative	Ⅰ-Ⅱ
Live	48.4271	Negative	Female	>60	≤5cm	Poor/undifferentiation	No	Ngative	Ⅰ-Ⅱ
dead	24.2793	Positive	Female	>60	≤5cm	Poor/undifferentiation	No	Ngative	Ⅰ-Ⅱ
Live	46.1273	Negative	Male	≤60	>5cm	Poor/undifferentiation	No	Ngative	Ⅰ-Ⅱ
dead	32.5914	Negative	Male	>60	>5cm	Poor/undifferentiation	No	Ngative	Ⅰ-Ⅱ
dead	30.2259	Negative	Male	>60	>5cm	Poor/undifferentiation	No	Ngative	Ⅰ-Ⅱ
Live	29.1088	Negative	Female	>60	>5cm	Poor/undifferentiation	No	Ngative	Ⅰ-Ⅱ
dead	50.037	Negative	Female	>60	>5cm	Poor/undifferentiation	No	Ngative	Ⅰ-Ⅱ
Live	80.6776	Negative	Male	≤60	≤5cm	Poor/undifferentiation	No	Positive	Ⅰ-Ⅱ
Live	91.1355	Negative	Female	≤60	≤5cm	Poor/undifferentiation	No	Positive	Ⅰ-Ⅱ
dead	49.3799	Negative	Male	>60	≤5cm	Poor/undifferentiation	No	Positive	Ⅰ-Ⅱ
dead	65.2608	Negative	Male	≤60	>5cm	Poor/undifferentiation	No	Positive	Ⅰ-Ⅱ
dead	20.5667	Negative	Female	≤60	>5cm	Poor/undifferentiation	No	Positive	Ⅰ-Ⅱ
dead	71.0965	Positive	Female	≤60	>5cm	Poor/undifferentiation	No	Positive	Ⅰ-Ⅱ
Live	29.7659	Negative	Female	>60	>5cm	Poor/undifferentiation	No	Positive	Ⅰ-Ⅱ
Live	76.5257	Negative	Male	≤60	≤5cm	Poor/undifferentiation	Yes	Ngative	Ⅰ-Ⅱ
Live	30.2259	Negative	Male	≤60	≤5cm	Poor/undifferentiation	Yes	Ngative	Ⅰ-Ⅱ
dead	73.9446	Positive	Male	≤60	≤5cm	Poor/undifferentiation	Yes	Ngative	Ⅰ-Ⅱ
dead	24.2136	Negative	Female	≤60	≤5cm	Poor/undifferentiation	Yes	Ngative	Ⅰ-Ⅱ
dead	38.768	Positive	Female	≤60	≤5cm	Poor/undifferentiation	Yes	Ngative	Ⅰ-Ⅱ
dead	34.924	Positive	Female	≤60	≤5cm	Poor/undifferentiation	Yes	Ngative	Ⅰ-Ⅱ
dead	70.8665	Positive	Male	>60	≤5cm	Poor/undifferentiation	Yes	Ngative	Ⅰ-Ⅱ
Live	57.7577	Positive	Female	>60	≤5cm	Poor/undifferentiation	Yes	Ngative	Ⅰ-Ⅱ
dead	50.037	Positive	Female	>60	≤5cm	Poor/undifferentiation	Yes	Ngative	Ⅰ-Ⅱ
dead	29.7659	Negative	Male	≤60	>5cm	Poor/undifferentiation	Yes	Ngative	Ⅰ-Ⅱ
dead	34.8583	Positive	Male	≤60	>5cm	Poor/undifferentiation	Yes	Ngative	Ⅰ-Ⅱ
dead	31.0801	Positive	Female	≤60	>5cm	Poor/undifferentiation	Yes	Ngative	Ⅰ-Ⅱ
Live	70.3737	Negative	Male	>60	>5cm	Poor/undifferentiation	Yes	Ngative	Ⅰ-Ⅱ
dead	37.7823	Positive	Male	>60	>5cm	Poor/undifferentiation	Yes	Ngative	Ⅰ-Ⅱ
Live	62.9815	Negative	Female	>60	>5cm	Poor/undifferentiation	Yes	Ngative	Ⅰ-Ⅱ
dead	40.1478	Positive	Male	>60	≤5cm	Poor/undifferentiation	Yes	Positive	Ⅰ-Ⅱ
dead	36.1068	Positive	Female	≤60	>5cm	Poor/undifferentiation	Yes	Positive	Ⅰ-Ⅱ
dead	26.1191	Positive	Male	>60	≤5cm	Well/moderate	No	Positive	Ⅲ
Live	71.5462	Negative	Male	≤60	>5cm	Well/moderate	No	Positive	Ⅲ
dead	29.1088	Positive	Female	≤60	>5cm	Well/moderate	No	Positive	Ⅲ
Live	79.9097	Positive	Female	>60	>5cm	Well/moderate	No	Positive	Ⅲ
Live	20.8296	Negative	Male	≤60	≤5cm	Well/moderate	Yes	Ngative	Ⅲ
dead	15.1786	Positive	Male	>60	≤5cm	Well/moderate	Yes	Ngative	Ⅲ
dead	22.8008	Negative	Male	>60	>5cm	Well/moderate	Yes	Ngative	Ⅲ
Live	69.8809	Positive	Male	≤60	≤5cm	Well/moderate	Yes	Positive	Ⅲ
dead	8.80493	Positive	Male	≤60	≤5cm	Well/moderate	Yes	Positive	Ⅲ
dead	7.62218	Positive	Male	≤60	≤5cm	Well/moderate	Yes	Positive	Ⅲ
dead	28.1561	Negative	Female	≤60	≤5cm	Well/moderate	Yes	Positive	Ⅲ
dead	14.9487	Positive	Female	≤60	≤5cm	Well/moderate	Yes	Positive	Ⅲ
dead	3.41684	Positive	Male	>60	≤5cm	Well/moderate	Yes	Positive	Ⅲ
dead	38.768	Positive	Female	>60	≤5cm	Well/moderate	Yes	Positive	Ⅲ
dead	28.1889	Positive	Female	>60	≤5cm	Well/moderate	Yes	Positive	Ⅲ
dead	27.039	Positive	Female	>60	≤5cm	Well/moderate	Yes	Positive	Ⅲ
Live	69.4538	Negative	Male	≤60	>5cm	Well/moderate	Yes	Positive	Ⅲ
dead	24.2793	Negative	Male	≤60	>5cm	Well/moderate	Yes	Positive	Ⅲ
dead	19.4497	Positive	Male	≤60	>5cm	Well/moderate	Yes	Positive	Ⅲ
dead	12.6817	Positive	Male	≤60	>5cm	Well/moderate	Yes	Positive	Ⅲ
dead	15.8029	Positive	Female	≤60	>5cm	Well/moderate	Yes	Positive	Ⅲ
dead	47.8357	Negative	Male	>60	>5cm	Well/moderate	Yes	Positive	Ⅲ
dead	34.8583	Negative	Male	>60	>5cm	Well/moderate	Yes	Positive	Ⅲ
dead	21.4867	Negative	Male	>60	>5cm	Well/moderate	Yes	Positive	Ⅲ
dead	16.6571	Negative	Male	>60	>5cm	Well/moderate	Yes	Positive	Ⅲ
dead	14.7187	Negative	Male	>60	>5cm	Well/moderate	Yes	Positive	Ⅲ
dead	31.77	Positive	Male	>60	>5cm	Well/moderate	Yes	Positive	Ⅲ
dead	24.2464	Positive	Male	>60	>5cm	Well/moderate	Yes	Positive	Ⅲ
dead	12.616	Positive	Female	>60	>5cm	Well/moderate	Yes	Positive	Ⅲ
dead	8.83778	Positive	Male	≤60	≤5cm	Poor/undifferentiation	No	Ngative	Ⅲ
Live	24.2136	Negative	Male	≤60	≤5cm	Poor/undifferentiation	No	Positive	Ⅲ
Live	23.3922	Negative	Male	≤60	≤5cm	Poor/undifferentiation	No	Positive	Ⅲ
Live	77.5544	Positive	Male	≤60	>5cm	Poor/undifferentiation	No	Positive	Ⅲ
dead	27.039	Negative	Female	≤60	>5cm	Poor/undifferentiation	No	Positive	Ⅲ
Live	48.4271	Negative	Male	≤60	≤5cm	Poor/undifferentiation	Yes	Ngative	Ⅲ
dead	12.6817	Positive	Male	≤60	≤5cm	Poor/undifferentiation	Yes	Ngative	Ⅲ
dead	6.07803	Positive	Female	≤60	≤5cm	Poor/undifferentiation	Yes	Ngative	Ⅲ
dead	20.961	Negative	Male	≤60	>5cm	Poor/undifferentiation	Yes	Ngative	Ⅲ
dead	14.9487	Negative	Male	≤60	>5cm	Poor/undifferentiation	Yes	Ngative	Ⅲ
dead	12.5832	Negative	Female	>60	>5cm	Poor/undifferentiation	Yes	Ngative	Ⅲ
Live	68.9938	Negative	Male	≤60	≤5cm	Poor/undifferentiation	Yes	Positive	Ⅲ
Live	68.6982	Positive	Male	≤60	≤5cm	Poor/undifferentiation	Yes	Positive	Ⅲ
dead	23.8193	Negative	Male	≤60	≤5cm	Poor/undifferentiation	Yes	Positive	Ⅲ
dead	18.8255	Negative	Male	≤60	≤5cm	Poor/undifferentiation	Yes	Positive	Ⅲ
dead	16.7556	Negative	Male	≤60	≤5cm	Poor/undifferentiation	Yes	Positive	Ⅲ
dead	12.8131	Negative	Male	≤60	≤5cm	Poor/undifferentiation	Yes	Positive	Ⅲ
dead	10.7105	Negative	Male	≤60	≤5cm	Poor/undifferentiation	Yes	Positive	Ⅲ
dead	8.44353	Negative	Male	≤60	≤5cm	Poor/undifferentiation	Yes	Positive	Ⅲ
dead	62.0267	Positive	Male	≤60	≤5cm	Poor/undifferentiation	Yes	Positive	Ⅲ
dead	22.7351	Positive	Male	≤60	≤5cm	Poor/undifferentiation	Yes	Positive	Ⅲ
dead	15.1786	Positive	Male	≤60	≤5cm	Poor/undifferentiation	Yes	Positive	Ⅲ
dead	15.1129	Positive	Male	≤60	≤5cm	Poor/undifferentiation	Yes	Positive	Ⅲ
dead	12.8131	Positive	Male	≤60	≤5cm	Poor/undifferentiation	Yes	Positive	Ⅲ
dead	12.4846	Positive	Male	≤60	≤5cm	Poor/undifferentiation	Yes	Positive	Ⅲ
dead	9.79055	Positive	Male	≤60	≤5cm	Poor/undifferentiation	Yes	Positive	Ⅲ
dead	5.68378	Positive	Male	≤60	≤5cm	Poor/undifferentiation	Yes	Positive	Ⅲ
dead	5.58522	Positive	Male	≤60	≤5cm	Poor/undifferentiation	Yes	Positive	Ⅲ
dead	28.386	Positive	Female	≤60	≤5cm	Poor/undifferentiation	Yes	Positive	Ⅲ
dead	28.1232	Positive	Female	≤60	≤5cm	Poor/undifferentiation	Yes	Positive	Ⅲ
dead	18.8255	Positive	Female	≤60	≤5cm	Poor/undifferentiation	Yes	Positive	Ⅲ
dead	17.577	Positive	Female	≤60	≤5cm	Poor/undifferentiation	Yes	Positive	Ⅲ
dead	9.88912	Positive	Female	≤60	≤5cm	Poor/undifferentiation	Yes	Positive	Ⅲ
Live	70.4867	Negative	Male	>60	≤5cm	Poor/undifferentiation	Yes	Positive	Ⅲ
Live	19.4497	Negative	Male	>60	≤5cm	Poor/undifferentiation	Yes	Positive	Ⅲ
dead	20.5667	Negative	Male	>60	≤5cm	Poor/undifferentiation	Yes	Positive	Ⅲ
dead	13.6345	Negative	Male	>60	≤5cm	Poor/undifferentiation	Yes	Positive	Ⅲ
dead	45.9959	Positive	Male	>60	≤5cm	Poor/undifferentiation	Yes	Positive	Ⅲ
dead	31.9671	Positive	Male	>60	≤5cm	Poor/undifferentiation	Yes	Positive	Ⅲ
dead	28.1232	Positive	Male	>60	≤5cm	Poor/undifferentiation	Yes	Positive	Ⅲ
dead	16.6571	Positive	Male	>60	≤5cm	Poor/undifferentiation	Yes	Positive	Ⅲ
dead	14.9487	Positive	Male	>60	≤5cm	Poor/undifferentiation	Yes	Positive	Ⅲ
dead	9.7577	Positive	Male	>60	≤5cm	Poor/undifferentiation	Yes	Positive	Ⅲ
dead	8.31211	Positive	Male	>60	≤5cm	Poor/undifferentiation	Yes	Positive	Ⅲ
dead	8.11499	Positive	Male	>60	≤5cm	Poor/undifferentiation	Yes	Positive	Ⅲ
dead	4.89528	Positive	Male	>60	≤5cm	Poor/undifferentiation	Yes	Positive	Ⅲ
dead	12.7474	Positive	Female	>60	≤5cm	Poor/undifferentiation	Yes	Positive	Ⅲ
dead	10.6776	Positive	Female	>60	≤5cm	Poor/undifferentiation	Yes	Positive	Ⅲ
Live	19.8768	Negative	Male	≤60	>5cm	Poor/undifferentiation	Yes	Positive	Ⅲ
dead	13.6345	Negative	Male	≤60	>5cm	Poor/undifferentiation	Yes	Positive	Ⅲ
dead	46.9815	Positive	Male	≤60	>5cm	Poor/undifferentiation	Yes	Positive	Ⅲ
dead	45.6674	Positive	Male	≤60	>5cm	Poor/undifferentiation	Yes	Positive	Ⅲ
dead	34.924	Positive	Male	≤60	>5cm	Poor/undifferentiation	Yes	Positive	Ⅲ
dead	21.4867	Positive	Male	≤60	>5cm	Poor/undifferentiation	Yes	Positive	Ⅲ
dead	15.77	Positive	Male	≤60	>5cm	Poor/undifferentiation	Yes	Positive	Ⅲ
dead	12.6817	Positive	Male	≤60	>5cm	Poor/undifferentiation	Yes	Positive	Ⅲ
dead	11.4004	Positive	Male	≤60	>5cm	Poor/undifferentiation	Yes	Positive	Ⅲ
dead	10.3819	Positive	Male	≤60	>5cm	Poor/undifferentiation	Yes	Positive	Ⅲ
Live	12.7474	Negative	Male	>60	>5cm	Poor/undifferentiation	Yes	Positive	Ⅲ
dead	30.6858	Negative	Male	>60	>5cm	Poor/undifferentiation	Yes	Positive	Ⅲ
dead	21.7166	Negative	Male	>60	>5cm	Poor/undifferentiation	Yes	Positive	Ⅲ
dead	20.8296	Negative	Male	>60	>5cm	Poor/undifferentiation	Yes	Positive	Ⅲ
dead	16.7556	Negative	Male	>60	>5cm	Poor/undifferentiation	Yes	Positive	Ⅲ
dead	31.6386	Positive	Male	>60	>5cm	Poor/undifferentiation	Yes	Positive	Ⅲ
dead	28.386	Positive	Male	>60	>5cm	Poor/undifferentiation	Yes	Positive	Ⅲ
dead	23.3922	Positive	Male	>60	>5cm	Poor/undifferentiation	Yes	Positive	Ⅲ
dead	10.3491	Positive	Male	>60	>5cm	Poor/undifferentiation	Yes	Positive	Ⅲ
dead	9.36345	Positive	Male	>60	>5cm	Poor/undifferentiation	Yes	Positive	Ⅲ
dead	6.93224	Positive	Male	>60	>5cm	Poor/undifferentiation	Yes	Positive	Ⅲ
dead	3.71253	Positive	Male	>60	>5cm	Poor/undifferentiation	Yes	Positive	Ⅲ
dead	2.00411	Positive	Male	>60	>5cm	Poor/undifferentiation	Yes	Positive	Ⅲ
dead	22.2423	Positive	Female	>60	>5cm	Poor/undifferentiation	Yes	Positive	Ⅲ

## Sheet: Fig 3A AGS
Sh-NC	Sh-EDIL3
0.95	0.316
1	0.286
1.05	0.247

## Sheet: Fig 3A 823
Sh-NC	Sh-EDIL3
0.95	0.353
1	0.486
1.08	0.387

## Sheet: Fig 3B AGS Cell Proliferation
		Sh-EDIL3			Sh-NC
0h	0	0.257	0.233	0.249	0.287	0.244	0.267
24h	1	0.447	0.52	0.446	0.601	0.637	0.673
48h	2	0.856	1.042	0.801	1.192	1.292	1.478
72h	3	1.606	1.356	1.432	1.923	1.781	2.114
96h	4	2.124	2.01	2.279	2.73	2.917	2.631

## Sheet: Fig 3B 823 Cell Proliferation
		Sh-EDIL3			Sh-NC
0h	0	0.24	0.223	0.239	0.251	0.242	0.239
24h	1	0.571	0.438	0.521	0.689	0.571	0.798
48h	2	1.007	0.76	0.881	1.23	1.092	1.397
72h	3	1.645	1.181	1.479	2.141	1.895	2.318
96h	4	2.459	2.092	2.271	2.87	2.854	3.111

## Sheet: Fig 3C AGS Colony Formation
Sh-NC	Sh-EDIL3
158	65
185	73
167	58

## Sheet: Fig 3C 823 Colony Formation
Sh-NC	Sh-EDIL3
149	65
130	51
137	58

## Sheet: Fig 3D AGS Invasion Migration
Invasion	Invasion		Migration	Migration
Sh-NC	Sh-EDIL3		Sh-NC	Sh-EDIL3
138	51		227	85
155	43		198	98
167	68		219	74

[truncated: 3 more sheets: Fig 3D 823 Invasion Migration, Fig 7A  ssGSEA, Fig 7C  ssGSEA]
