# Supplementary material for: EDIL3 is a potential prognostic biomarker that correlates with immune infiltrates in gastric cancer
Source: PeerJ. 2023 Aug 9;11:e15559. doi: 10.7717/peerj.15559 (PMC10422953; doi:10.7717/peerj.15559)
Supplement: Supplemental Information 2 [file peerj-11-15559-s002.xlsx]

## Sheet: Sheet1
Status	os	EDIL3	Gender	Age	size	differentiation	Lymph metastasis	Serosal invasion	pTNM stage
Live	47.8357	Positive	Female	>60	≤5cm	Well/moderate	No	Ngative	Ⅰ-Ⅱ
dead	28.1561	Negative	Female	>60	≤5cm	Well/moderate	No	Ngative	Ⅰ-Ⅱ
Live	31.9671	Positive	Male	>60	>5cm	Well/moderate	No	Ngative	Ⅰ-Ⅱ
dead	31.77	Positive	Male	>60	>5cm	Well/moderate	No	Ngative	Ⅰ-Ⅱ
dead	45.9959	Positive	Female	>60	>5cm	Well/moderate	No	Ngative	Ⅰ-Ⅱ
Live	72.6201	Negative	Male	>60	≤5cm	Well/moderate	No	Positive	Ⅰ-Ⅱ
Live	43.3676	Negative	Female	>60	≤5cm	Well/moderate	No	Positive	Ⅰ-Ⅱ
dead	10.6776	Positive	Female	>60	≤5cm	Well/moderate	No	Positive	Ⅰ-Ⅱ
Live	31.0801	Negative	Male	≤60	≤5cm	Well/moderate	Yes	Ngative	Ⅰ-Ⅱ
Live	30.6858	Negative	Male	≤60	≤5cm	Well/moderate	Yes	Ngative	Ⅰ-Ⅱ
Live	88.5359	Positive	Male	>60	≤5cm	Well/moderate	Yes	Ngative	Ⅰ-Ⅱ
Live	36.1068	Positive	Female	>60	≤5cm	Well/moderate	Yes	Ngative	Ⅰ-Ⅱ
dead	43.3676	Negative	Female	≤60	>5cm	Well/moderate	Yes	Ngative	Ⅰ-Ⅱ
dead	39.9507	Positive	Female	>60	>5cm	Well/moderate	Yes	Ngative	Ⅰ-Ⅱ
dead	15.77	Positive	Male	>60	≤5cm	Well/moderate	Yes	Positive	Ⅰ-Ⅱ
dead	29.2074	Negative	Male	≤60	≤5cm	Poor/undifferentiation	No	Ngative	Ⅰ-Ⅱ
Live	46.9815	Negative	Female	≤60	≤5cm	Poor/undifferentiation	No	Ngative	Ⅰ-Ⅱ
Live	46.1273	Negative	Female	≤60	≤5cm	Poor/undifferentiation	No	Ngative	Ⅰ-Ⅱ
Live	77.9055	Negative	Male	>60	≤5cm	Poor/undifferentiation	No	Ngative	Ⅰ-Ⅱ
Live	95.9281	Positive	Male	>60	≤5cm	Poor/undifferentiation	No	Ngative	Ⅰ-Ⅱ
Live	48.4271	Negative	Female	>60	≤5cm	Poor/undifferentiation	No	Ngative	Ⅰ-Ⅱ
dead	24.2793	Positive	Female	>60	≤5cm	Poor/undifferentiation	No	Ngative	Ⅰ-Ⅱ
Live	46.1273	Negative	Male	≤60	>5cm	Poor/undifferentiation	No	Ngative	Ⅰ-Ⅱ
dead	32.5914	Negative	Male	>60	>5cm	Poor/undifferentiation	No	Ngative	Ⅰ-Ⅱ
dead	30.2259	Negative	Male	>60	>5cm	Poor/undifferentiation	No	Ngative	Ⅰ-Ⅱ
Live	29.1088	Negative	Female	>60	>5cm	Poor/undifferentiation	No	Ngative	Ⅰ-Ⅱ
dead	50.037	Negative	Female	>60	>5cm	Poor/undifferentiation	No	Ngative	Ⅰ-Ⅱ
Live	80.6776	Negative	Male	≤60	≤5cm	Poor/undifferentiation	No	Positive	Ⅰ-Ⅱ
Live	91.1355	Negative	Female	≤60	≤5cm	Poor/undifferentiation	No	Positive	Ⅰ-Ⅱ
dead	49.3799	Negative	Male	>60	≤5cm	Poor/undifferentiation	No	Positive	Ⅰ-Ⅱ
dead	65.2608	Negative	Male	≤60	>5cm	Poor/undifferentiation	No	Positive	Ⅰ-Ⅱ
dead	20.5667	Negative	Female	≤60	>5cm	Poor/undifferentiation	No	Positive	Ⅰ-Ⅱ
dead	71.0965	Positive	Female	≤60	>5cm	Poor/undifferentiation	No	Positive	Ⅰ-Ⅱ
Live	29.7659	Negative	Female	>60	>5cm	Poor/undifferentiation	No	Positive	Ⅰ-Ⅱ
Live	76.5257	Negative	Male	≤60	≤5cm	Poor/undifferentiation	Yes	Ngative	Ⅰ-Ⅱ
Live	30.2259	Negative	Male	≤60	≤5cm	Poor/undifferentiation	Yes	Ngative	Ⅰ-Ⅱ
dead	73.9446	Positive	Male	≤60	≤5cm	Poor/undifferentiation	Yes	Ngative	Ⅰ-Ⅱ
dead	24.2136	Negative	Female	≤60	≤5cm	Poor/undifferentiation	Yes	Ngative	Ⅰ-Ⅱ
dead	38.768	Positive	Female	≤60	≤5cm	Poor/undifferentiation	Yes	Ngative	Ⅰ-Ⅱ
dead	34.924	Positive	Female	≤60	≤5cm	Poor/undifferentiation	Yes	Ngative	Ⅰ-Ⅱ
dead	70.8665	Positive	Male	>60	≤5cm	Poor/undifferentiation	Yes	Ngative	Ⅰ-Ⅱ
Live	57.7577	Positive	Female	>60	≤5cm	Poor/undifferentiation	Yes	Ngative	Ⅰ-Ⅱ
dead	50.037	Positive	Female	>60	≤5cm	Poor/undifferentiation	Yes	Ngative	Ⅰ-Ⅱ
dead	29.7659	Negative	Male	≤60	>5cm	Poor/undifferentiation	Yes	Ngative	Ⅰ-Ⅱ
dead	34.8583	Positive	Male	≤60	>5cm	Poor/undifferentiation	Yes	Ngative	Ⅰ-Ⅱ
dead	31.0801	Positive	Female	≤60	>5cm	Poor/undifferentiation	Yes	Ngative	Ⅰ-Ⅱ
Live	70.3737	Negative	Male	>60	>5cm	Poor/undifferentiation	Yes	Ngative	Ⅰ-Ⅱ
dead	37.7823	Positive	Male	>60	>5cm	Poor/undifferentiation	Yes	Ngative	Ⅰ-Ⅱ
Live	62.9815	Negative	Female	>60	>5cm	Poor/undifferentiation	Yes	Ngative	Ⅰ-Ⅱ
dead	40.1478	Positive	Male	>60	≤5cm	Poor/undifferentiation	Yes	Positive	Ⅰ-Ⅱ
dead	36.1068	Positive	Female	≤60	>5cm	Poor/undifferentiation	Yes	Positive	Ⅰ-Ⅱ
dead	26.1191	Positive	Male	>60	≤5cm	Well/moderate	No	Positive	Ⅲ
Live	71.5462	Negative	Male	≤60	>5cm	Well/moderate	No	Positive	Ⅲ
dead	29.1088	Positive	Female	≤60	>5cm	Well/moderate	No	Positive	Ⅲ
Live	79.9097	Positive	Female	>60	>5cm	Well/moderate	No	Positive	Ⅲ
Live	20.8296	Negative	Male	≤60	≤5cm	Well/moderate	Yes	Ngative	Ⅲ
dead	15.1786	Positive	Male	>60	≤5cm	Well/moderate	Yes	Ngative	Ⅲ
dead	22.8008	Negative	Male	>60	>5cm	Well/moderate	Yes	Ngative	Ⅲ
Live	69.8809	Positive	Male	≤60	≤5cm	Well/moderate	Yes	Positive	Ⅲ
dead	8.80493	Positive	Male	≤60	≤5cm	Well/moderate	Yes	Positive	Ⅲ
dead	7.62218	Positive	Male	≤60	≤5cm	Well/moderate	Yes	Positive	Ⅲ
dead	28.1561	Negative	Female	≤60	≤5cm	Well/moderate	Yes	Positive	Ⅲ
dead	14.9487	Positive	Female	≤60	≤5cm	Well/moderate	Yes	Positive	Ⅲ
dead	3.41684	Positive	Male	>60	≤5cm	Well/moderate	Yes	Positive	Ⅲ
dead	38.768	Positive	Female	>60	≤5cm	Well/moderate	Yes	Positive	Ⅲ
dead	28.1889	Positive	Female	>60	≤5cm	Well/moderate	Yes	Positive	Ⅲ
dead	27.039	Positive	Female	>60	≤5cm	Well/moderate	Yes	Positive	Ⅲ
Live	69.4538	Negative	Male	≤60	>5cm	Well/moderate	Yes	Positive	Ⅲ
dead	24.2793	Negative	Male	≤60	>5cm	Well/moderate	Yes	Positive	Ⅲ
dead	19.4497	Positive	Male	≤60	>5cm	Well/moderate	Yes	Positive	Ⅲ
dead	12.6817	Positive	Male	≤60	>5cm	Well/moderate	Yes	Positive	Ⅲ
dead	15.8029	Positive	Female	≤60	>5cm	Well/moderate	Yes	Positive	Ⅲ
dead	47.8357	Negative	Male	>60	>5cm	Well/moderate	Yes	Positive	Ⅲ
dead	34.8583	Negative	Male	>60	>5cm	Well/moderate	Yes	Positive	Ⅲ
dead	21.4867	Negative	Male	>60	>5cm	Well/moderate	Yes	Positive	Ⅲ
dead	16.6571	Negative	Male	>60	>5cm	Well/moderate	Yes	Positive	Ⅲ
dead	14.7187	Negative	Male	>60	>5cm	Well/moderate	Yes	Positive	Ⅲ
dead	31.77	Positive	Male	>60	>5cm	Well/moderate	Yes	Positive	Ⅲ
dead	24.2464	Positive	Male	>60	>5cm	Well/moderate	Yes	Positive	Ⅲ
dead	12.616	Positive	Female	>60	>5cm	Well/moderate	Yes	Positive	Ⅲ
dead	8.83778	Positive	Male	≤60	≤5cm	Poor/undifferentiation	No	Ngative	Ⅲ
Live	24.2136	Negative	Male	≤60	≤5cm	Poor/undifferentiation	No	Positive	Ⅲ
Live	23.3922	Negative	Male	≤60	≤5cm	Poor/undifferentiation	No	Positive	Ⅲ
Live	77.5544	Positive	Male	≤60	>5cm	Poor/undifferentiation	No	Positive	Ⅲ
dead	27.039	Negative	Female	≤60	>5cm	Poor/undifferentiation	No	Positive	Ⅲ
Live	48.4271	Negative	Male	≤60	≤5cm	Poor/undifferentiation	Yes	Ngative	Ⅲ
dead	12.6817	Positive	Male	≤60	≤5cm	Poor/undifferentiation	Yes	Ngative	Ⅲ
dead	6.07803	Positive	Female	≤60	≤5cm	Poor/undifferentiation	Yes	Ngative	Ⅲ
dead	20.961	Negative	Male	≤60	>5cm	Poor/undifferentiation	Yes	Ngative	Ⅲ
dead	14.9487	Negative	Male	≤60	>5cm	Poor/undifferentiation	Yes	Ngative	Ⅲ
dead	12.5832	Negative	Female	>60	>5cm	Poor/undifferentiation	Yes	Ngative	Ⅲ
Live	68.9938	Negative	Male	≤60	≤5cm	Poor/undifferentiation	Yes	Positive	Ⅲ
Live	68.6982	Positive	Male	≤60	≤5cm	Poor/undifferentiation	Yes	Positive	Ⅲ
dead	23.8193	Negative	Male	≤60	≤5cm	Poor/undifferentiation	Yes	Positive	Ⅲ
dead	18.8255	Negative	Male	≤60	≤5cm	Poor/undifferentiation	Yes	Positive	Ⅲ
dead	16.7556	Negative	Male	≤60	≤5cm	Poor/undifferentiation	Yes	Positive	Ⅲ
dead	12.8131	Negative	Male	≤60	≤5cm	Poor/undifferentiation	Yes	Positive	Ⅲ
dead	10.7105	Negative	Male	≤60	≤5cm	Poor/undifferentiation	Yes	Positive	Ⅲ
dead	8.44353	Negative	Male	≤60	≤5cm	Poor/undifferentiation	Yes	Positive	Ⅲ
dead	62.0267	Positive	Male	≤60	≤5cm	Poor/undifferentiation	Yes	Positive	Ⅲ
dead	22.7351	Positive	Male	≤60	≤5cm	Poor/undifferentiation	Yes	Positive	Ⅲ
dead	15.1786	Positive	Male	≤60	≤5cm	Poor/undifferentiation	Yes	Positive	Ⅲ
dead	15.1129	Positive	Male	≤60	≤5cm	Poor/undifferentiation	Yes	Positive	Ⅲ
dead	12.8131	Positive	Male	≤60	≤5cm	Poor/undifferentiation	Yes	Positive	Ⅲ
dead	12.4846	Positive	Male	≤60	≤5cm	Poor/undifferentiation	Yes	Positive	Ⅲ
dead	9.79055	Positive	Male	≤60	≤5cm	Poor/undifferentiation	Yes	Positive	Ⅲ
dead	5.68378	Positive	Male	≤60	≤5cm	Poor/undifferentiation	Yes	Positive	Ⅲ
dead	5.58522	Positive	Male	≤60	≤5cm	Poor/undifferentiation	Yes	Positive	Ⅲ
dead	28.386	Positive	Female	≤60	≤5cm	Poor/undifferentiation	Yes	Positive	Ⅲ
dead	28.1232	Positive	Female	≤60	≤5cm	Poor/undifferentiation	Yes	Positive	Ⅲ
dead	18.8255	Positive	Female	≤60	≤5cm	Poor/undifferentiation	Yes	Positive	Ⅲ
dead	17.577	Positive	Female	≤60	≤5cm	Poor/undifferentiation	Yes	Positive	Ⅲ
dead	9.88912	Positive	Female	≤60	≤5cm	Poor/undifferentiation	Yes	Positive	Ⅲ
Live	70.4867	Negative	Male	>60	≤5cm	Poor/undifferentiation	Yes	Positive	Ⅲ
Live	19.4497	Negative	Male	>60	≤5cm	Poor/undifferentiation	Yes	Positive	Ⅲ
dead	20.5667	Negative	Male	>60	≤5cm	Poor/undifferentiation	Yes	Positive	Ⅲ
dead	13.6345	Negative	Male	>60	≤5cm	Poor/undifferentiation	Yes	Positive	Ⅲ
dead	45.9959	Positive	Male	>60	≤5cm	Poor/undifferentiation	Yes	Positive	Ⅲ
dead	31.9671	Positive	Male	>60	≤5cm	Poor/undifferentiation	Yes	Positive	Ⅲ
dead	28.1232	Positive	Male	>60	≤5cm	Poor/undifferentiation	Yes	Positive	Ⅲ
dead	16.6571	Positive	Male	>60	≤5cm	Poor/undifferentiation	Yes	Positive	Ⅲ
dead	14.9487	Positive	Male	>60	≤5cm	Poor/undifferentiation	Yes	Positive	Ⅲ
dead	9.7577	Positive	Male	>60	≤5cm	Poor/undifferentiation	Yes	Positive	Ⅲ
dead	8.31211	Positive	Male	>60	≤5cm	Poor/undifferentiation	Yes	Positive	Ⅲ
dead	8.11499	Positive	Male	>60	≤5cm	Poor/undifferentiation	Yes	Positive	Ⅲ
dead	4.89528	Positive	Male	>60	≤5cm	Poor/undifferentiation	Yes	Positive	Ⅲ
dead	12.7474	Positive	Female	>60	≤5cm	Poor/undifferentiation	Yes	Positive	Ⅲ
dead	10.6776	Positive	Female	>60	≤5cm	Poor/undifferentiation	Yes	Positive	Ⅲ
Live	19.8768	Negative	Male	≤60	>5cm	Poor/undifferentiation	Yes	Positive	Ⅲ
dead	13.6345	Negative	Male	≤60	>5cm	Poor/undifferentiation	Yes	Positive	Ⅲ
dead	46.9815	Positive	Male	≤60	>5cm	Poor/undifferentiation	Yes	Positive	Ⅲ
dead	45.6674	Positive	Male	≤60	>5cm	Poor/undifferentiation	Yes	Positive	Ⅲ
dead	34.924	Positive	Male	≤60	>5cm	Poor/undifferentiation	Yes	Positive	Ⅲ
dead	21.4867	Positive	Male	≤60	>5cm	Poor/undifferentiation	Yes	Positive	Ⅲ
dead	15.77	Positive	Male	≤60	>5cm	Poor/undifferentiation	Yes	Positive	Ⅲ
dead	12.6817	Positive	Male	≤60	>5cm	Poor/undifferentiation	Yes	Positive	Ⅲ
dead	11.4004	Positive	Male	≤60	>5cm	Poor/undifferentiation	Yes	Positive	Ⅲ
dead	10.3819	Positive	Male	≤60	>5cm	Poor/undifferentiation	Yes	Positive	Ⅲ
Live	12.7474	Negative	Male	>60	>5cm	Poor/undifferentiation	Yes	Positive	Ⅲ
dead	30.6858	Negative	Male	>60	>5cm	Poor/undifferentiation	Yes	Positive	Ⅲ
dead	21.7166	Negative	Male	>60	>5cm	Poor/undifferentiation	Yes	Positive	Ⅲ
dead	20.8296	Negative	Male	>60	>5cm	Poor/undifferentiation	Yes	Positive	Ⅲ
dead	16.7556	Negative	Male	>60	>5cm	Poor/undifferentiation	Yes	Positive	Ⅲ
dead	31.6386	Positive	Male	>60	>5cm	Poor/undifferentiation	Yes	Positive	Ⅲ
dead	28.386	Positive	Male	>60	>5cm	Poor/undifferentiation	Yes	Positive	Ⅲ
dead	23.3922	Positive	Male	>60	>5cm	Poor/undifferentiation	Yes	Positive	Ⅲ
dead	10.3491	Positive	Male	>60	>5cm	Poor/undifferentiation	Yes	Positive	Ⅲ
dead	9.36345	Positive	Male	>60	>5cm	Poor/undifferentiation	Yes	Positive	Ⅲ
dead	6.93224	Positive	Male	>60	>5cm	Poor/undifferentiation	Yes	Positive	Ⅲ
dead	3.71253	Positive	Male	>60	>5cm	Poor/undifferentiation	Yes	Positive	Ⅲ
dead	2.00411	Positive	Male	>60	>5cm	Poor/undifferentiation	Yes	Positive	Ⅲ
dead	22.2423	Positive	Female	>60	>5cm	Poor/undifferentiation	Yes	Positive	Ⅲ
