# Supplementary material for: EDIL3 is a potential prognostic biomarker that correlates with immune infiltrates in gastric cancer
Source: PeerJ. 2023 Aug 9;11:e15559. doi: 10.7717/peerj.15559 (PMC10422953; doi:10.7717/peerj.15559)
Supplement: Table S1 [file peerj-11-15559-s001.xlsx]

## Sheet: Sheet1
Supplementary Table S1. Results of correlation between EDIL3 expression and drug sensitivity
Compound	RNAmolecule	Omics	Source	r-Pearson	FDR-Pearson	r-Spearman	FDR-Spearman
(5Z)-7-Oxozeaenol	mRNA	EDIL3	CNV	GDSC	-	-	-0.117611	0.0329437
(z)-2-(5-nitrofuran-2-ylmethylene)-3(2h)-benzofuranone	mRNA	EDIL3	Expression	CellMiner	-	-	-0.517181	0.0108484
(z)-3-bromo-3-iodo-2-phenylpropenal	mRNA	EDIL3	Expression	CellMiner	-	-	-0.417925	0.0393514
(z)-4-iodo-3-phenyl-3-buten-2-one	mRNA	EDIL3	Expression	CellMiner	-	-	-0.474575	0.0320084
.alpha.-sarcin	mRNA	EDIL3	Expression	CellMiner	-	-	0.400561	0.0486137
.alpha.-sarcin	mRNA	EDIL3	Methylation	CellMiner	-0.43669	0.0136405	-0.45678	0.00650527
1(2h)-naphthalenone, 2,2-dibromo-3,4-dihydro-	mRNA	EDIL3	Expression	CellMiner	-	-	-0.489107	0.0371502
1,1,3-tribromo-3-methyl-2-butanone	mRNA	EDIL3	Expression	CellMiner	-0.412532	0.0368677	-	-
1,1-diiodo-2,2-dimethoxy-2-phenylethane	mRNA	EDIL3	Expression	CellMiner	-0.393096	0.0266927	-	-
1,2-cyclohexanediamine, platinum complex (9ci)	mRNA	EDIL3	Expression	CellMiner	-	-	-0.374666	0.038765
1,2-dimethoxy-4-(2-nitropropenyl)benzene	mRNA	EDIL3	Expression	CellMiner	-	-	-0.488149	0.0438317
1,3,6-triphenyl-oxazolo(5,4-d)pyrimidin-2',4(1h,3h)-dion	mRNA	EDIL3	Expression	CellMiner	0.439003	0.0181919	0.558909	0.000404181
1,3-butadiene, 1,1,2,4,4-pentachloro-3-nitro-	mRNA	EDIL3	Expression	CellMiner	-0.430282	0.015721	-0.494748	0.00656417
1,3-diphenylbenzo[e]-[1,2,4]triazin-7(1h)-one	mRNA	EDIL3	Expression	CellMiner	-	-	-0.473361	0.031845
1,3-dithiolo[3,4-d]pyrimidine-2-thione, 5,7-dichloro-	mRNA	EDIL3	Expression	CellMiner	-	-	-0.409794	0.0264497
1,4-naphthalenedione, 5,8-dihydroxy-2,3-bis(hydroxymethyl)-	mRNA	EDIL3	Expression	CellMiner	-0.395639	0.0273957	-0.450391	0.0190536
1,4-naphthoquinone, 2,2'-(1,4-piperazinediyl)bis[3-chloro-	mRNA	EDIL3	Expression	CellMiner	-0.348333	0.0474554	-	-
1,5-dihydroxy-1,5-di(pyridin-3-yl)pentan-3-one	mRNA	EDIL3	Expression	CellMiner	-0.38857	0.0182043	-	-
1-naphthalenecarboxamide, n,n'-1,8-(octanediyl)bis-	mRNA	EDIL3	Methylation	CellMiner	-0.451976	0.0318348	-0.442054	0.0267008
1-penten-3-one, 5-(4-morpholinyl)-1-phenyl-, hydrochloride	mRNA	EDIL3	Expression	CellMiner	-0.378822	0.0227876	-0.455752	0.0269662
1-piperidinecarbodithioic acid, antimony complex	mRNA	EDIL3	Expression	CellMiner	-0.429297	0.0109645	-0.427284	0.0194677
1h-1,4,7-triazonine-1,4,7-triacetic acid, octahydro-	mRNA	EDIL3	Expression	CellMiner	-0.418018	0.0304537	-	-
1h-benzo[a]carbazole-1,4(11h)-dione, 11-methyl-	mRNA	EDIL3	Expression	CellMiner	-	-	-0.382299	0.0476668
1h-benzo[a]carbazole-1,4(11h)-dione, 8-methoxy-	mRNA	EDIL3	Expression	CellMiner	-0.344648	0.0465819	-0.407197	0.0461433
1h-benzo[a]carbazole-1,4(11h)-dione, 8-methoxy-11- methyl-	mRNA	EDIL3	Expression	CellMiner	-0.347572	0.0411521	-0.40932	0.0496008
2,1,3-benzoselanadiazole, nitro-6-(trifluoromethyl)-	mRNA	EDIL3	Expression	CellMiner	-0.363208	0.0403156	-	-
2,4-cyclopentadien-1-one, 2-bromo-3,4,5-triphenyl- (9ci)	mRNA	EDIL3	Expression	CellMiner	-	-	-0.418046	0.0304558
2,6-bis(4-morpholinylmethyl)cyclohexanone,dihydrochloride	mRNA	EDIL3	Expression	CellMiner	-0.460015	0.0216596	-0.515783	0.00918145
2-(1-piperazino)naphthazarin	mRNA	EDIL3	Expression	CellMiner	-0.464217	0.0142548	-0.552278	0.00135358
2-[(z)-bromoiodomethylidene] cyclohexanone	mRNA	EDIL3	Expression	CellMiner	-0.434711	0.00630507	-0.527992	0.00158084
2-amino-5,8-dihydroxy-1,4-naphthoquinone	mRNA	EDIL3	Expression	CellMiner	-0.431857	0.0116259	-0.411138	0.018603
2-azabicyclo[16.3.1]docosane, geldanamycin deriv.	mRNA	EDIL3	Expression	CellMiner	-	-	-0.441042	0.0181248
2-bromo-5,8-dihydroxy-3-methyl-1,4-naphthoquinone	mRNA	EDIL3	Expression	CellMiner	-0.370579	0.0263038	-0.397699	0.0415118
2-bromo-8-hydroxy-6-methyl-1,4-naphthoquinone	mRNA	EDIL3	Expression	CellMiner	-0.359615	0.0348347	-	-
2-chloro-3-(2-chloroethoxy)-naphthazarin	mRNA	EDIL3	Expression	CellMiner	-0.383189	0.0222555	-0.447375	0.0193109
2-chloro-3-(3-chloro-propyloxy)-naphthazarin	mRNA	EDIL3	Expression	CellMiner	-	-	-0.406803	0.0424348
2-chloro-3-(n-(l)-tyrosinamido)naphthazarin	mRNA	EDIL3	Expression	CellMiner	-0.380262	0.0268153	-0.476146	0.00427767
2-methoxycarbonyl-3,4-dichloro-5-nitrofuran	mRNA	EDIL3	Expression	CellMiner	-	-	-0.449518	0.0486685
2-methylolivacinium acetate	mRNA	EDIL3	Methylation	CellMiner	-0.42083	0.0298845	-0.394776	0.0324606
2-propen-1-one, 3-(1-naphthalenyl)-1-phenyl- (9ci)	mRNA	EDIL3	Expression	CellMiner	-0.354536	0.0384867	-0.394303	0.0345528
3,5-dimethoxy-beta-methyl-beta-nitrostyrene	mRNA	EDIL3	Expression	CellMiner	-0.356295	0.040989	-	-
3-(hydroxymethoxymethyl)-3-butene-2-one	mRNA	EDIL3	Expression	CellMiner	-0.37162	0.046057	-	-
3-(tert-butyldimethylsilyloxymethyl)-3-butene-2-one	mRNA	EDIL3	Expression	CellMiner	-0.385884	0.0239656	-0.412071	0.0231629
3-acridineamine, 9-[[(4-nitrophenyl)methyl]thio]-	mRNA	EDIL3	Expression	CellMiner	-0.337957	0.0467232	-0.407503	0.0356393
3-nitro-5-formylisoxazole	mRNA	EDIL3	Expression	CellMiner	-0.444956	0.0124908	-0.416602	0.0167671
4'-azido-3-nitro-1-methyl-2-quinolone	mRNA	EDIL3	Expression	CellMiner	-	-	-0.431013	0.0440013
4-(1-isobutyloxypropen-2-yl-)-2-methoxyphenylisobutyrat	mRNA	EDIL3	Expression	CellMiner	-	-	-0.43939	0.0410104
4-(5'-bromofuran-2'-yl)-3-bromo-but-3-en-2-one	mRNA	EDIL3	Expression	CellMiner	-	-	-0.422881	0.0477905
4-demethylcalycopterone	mRNA	EDIL3	Expression	CellMiner	-0.366676	0.0388655	-	-
4-piperidinone, 1-methyl-2,6-bis[(2-nitrophenyl)methylene]-	mRNA	EDIL3	Expression	CellMiner	-0.403611	0.0434069	-0.430572	0.034659
4-thiomorpholinecarbodithioic acid, antimony complex	mRNA	EDIL3	Expression	CellMiner	-0.477559	0.00309116	-0.482035	0.00530136
4h-1-benzothiopyran-4-one, 2-(methylsulfinyl)-	mRNA	EDIL3	Expression	CellMiner	-0.476237	0.0177688	-0.522981	0.00758057
4h-1-benzothiopyran-4-one, 2-(methylsulfonyl)-	mRNA	EDIL3	Expression	CellMiner	-0.449301	0.0274151	-0.501153	0.012236
5,8-quinolinedione, 2-methyl-	mRNA	EDIL3	Expression	CellMiner	-	-	-0.444173	0.0329728
5-Fluorouracil	mRNA	EDIL3	CNV	GDSC	0.108792	0.00157805	0.0967491	0.00486285
5-Fluorouracil	mRNA	EDIL3	Expression	GDSC	0.124975	0.000340794	0.0909864	0.00945113
6-ethoxy-benzothiazol-2-yl-carbamic acid ethyl ester	mRNA	EDIL3	Expression	CellMiner	-0.460418	0.0426561	-0.439874	0.0394373
6-phenyl-6h-indeno[1,2-c]isoquinoline-5,11-dione	mRNA	EDIL3	Expression	CellMiner	0.42164	0.0294	0.482562	0.0107444
7,12-epidioxybenz[a]anthracene, 7,12-dihydro-7-methyl-	mRNA	EDIL3	Expression	CellMiner	-0.392078	0.0363374	-	-
7-(.beta.-d-ribofuranosyl)-4-aminothieno[3,4-d]pyrimidine	mRNA	EDIL3	Expression	CellMiner	-0.432141	0.023523	-	-
7-nitro-3-trifluoroacetamido-1,2,4-benzotriazine 1-oxide	mRNA	EDIL3	Expression	CellMiner	-0.438772	0.04243	-	-
8-aminoadenosine	mRNA	EDIL3	Expression	CellMiner	-0.467141	0.0265627	-0.477074	0.0277942
8-Chloro-adenosine	mRNA	EDIL3	Expression	CellMiner	-	-	-0.378315	0.048639
8-quinolinol, vanadium(v) complex	mRNA	EDIL3	Expression	CellMiner	-0.421383	0.0398302	-	-
9-.beta.-hydroxyparthenolide	mRNA	EDIL3	Expression	CellMiner	-0.444696	0.0191749	-0.428713	0.0187852
;(E)-5-chloro-3-((2-methyl-6-phenylimidazo[2,1-b][1,3,4]...	mRNA	EDIL3	Expression	CellMiner	-	-	0.395537	0.0461771
;(E)-5-chloro-3-((6-(4-chlorophenyl)-2-cyclopropylimidaz...	mRNA	EDIL3	Expression	CellMiner	0.430932	0.00529508	0.470407	0.00370997
;(trans-1,2-Cyclohexanediamine)(dihydrogen pyrophosphato...	mRNA	EDIL3	Expression	CellMiner	-	-	-0.453446	0.0428687
;(Z)-5-Methoxy-2-(1-methyl-5-nitroimidazole-2-ylmethylen...	mRNA	EDIL3	Expression	CellMiner	-	-	-0.398083	0.0442999
;1,3-bis(trifluoromethyl)-2,4-diaza-butadientylamido,N,N...	mRNA	EDIL3	Expression	CellMiner	-0.401539	0.0453137	-	-
;1,3-diphenyl-4-(3-phenyl-4,5-dihydro-1H-pyrazol-5-yl)-1...	mRNA	EDIL3	Expression	CellMiner	0.402684	0.018649	0.513523	0.00246048
;1-(6-chloro-1H-benzo[d]imidazol-2-yl)-3-(4-methoxypheny...	mRNA	EDIL3	Expression	CellMiner	0.349548	0.0415427	0.42853	0.0272799
;5,6-dichloro-2-(3-(4-methoxyphenyl)imidazo[1,5-a]pyridi...	mRNA	EDIL3	Expression	CellMiner	0.444555	0.0132184	0.552309	0.00204347
;5,6-dichloro-2-(3-(4-methoxyphenyl)imidazo[1,5-a]pyridi...	mRNA	EDIL3	Methylation	CellMiner	-	-	-0.455974	0.0251634
;N-(7-benzyl-6,8-dibromo-5,7-dihydro-4H-[1,3]thiazolo[4,...	mRNA	EDIL3	Expression	CellMiner	0.414306	0.0420892	-	-
[co(me2dtc)2(dee)]clo4	mRNA	EDIL3	Expression	CellMiner	-	-	-0.457833	0.0114666
acetic acid, [1,4,7,10-tetraazacyclododecane-1,7-diyl]bis	mRNA	EDIL3	Expression	CellMiner	-0.383877	0.0288283	-0.414069	0.0253594
acetylrolandrolide	mRNA	EDIL3	Expression	CellMiner	-0.418141	0.0236407	-0.444312	0.0338364
acridine, 9-[5-(ethylthio)-1,3,4-thiadiazol-2-yl]-	mRNA	EDIL3	Expression	CellMiner	-0.433043	0.0124897	-0.482472	0.0121559
Afatinib	mRNA	EDIL3	CNV	GDSC	0.0924218	0.0411292	-	-
Afatinib	mRNA	EDIL3	Expression	GDSC	0.095861	0.0116257	0.0959808	0.012085
AICA Ribonucleotide	mRNA	EDIL3	CNV	GDSC	0.102477	0.00457556	0.0906799	0.0185774
AICA Ribonucleotide	mRNA	EDIL3	Expression	GDSC	0.101139	0.00512255	-	-
AICA Ribonucleotide	mRNA	EDIL3	Methylation	GDSC	-0.109792	0.0029627	-0.0916002	0.0162362
AKT inhibitor VIII	mRNA	EDIL3	CNV	GDSC	0.119726	0.0058753	0.124206	0.00135761
AKT inhibitor VIII	mRNA	EDIL3	Methylation	GDSC	-0.115838	0.00172041	-0.0965523	0.0118683
Alectinib	mRNA	EDIL3	CNV	GDSC	-	-	0.117618	0.00527779
Alectinib	mRNA	EDIL3	Expression	GDSC	0.0848005	0.0209731	-	-
Alectinib	mRNA	EDIL3	Methylation	GDSC	-0.114365	0.00188606	-	-
alsterpaullone	mRNA	EDIL3	Methylation	CellMiner	0.320147	0.0353874	-	-
Amuvatinib	mRNA	EDIL3	CNV	GDSC	-	-	0.081419	0.0316859
Amuvatinib	mRNA	EDIL3	Expression	GDSC	0.0997696	0.00551527	0.143457	2.93441e-05
antineoplastic-376265	mRNA	EDIL3	Expression	CellMiner	-0.436969	0.0281072	-0.463208	0.0113559
antineoplastic-615538	mRNA	EDIL3	Expression	CellMiner	-	-	-0.37871	0.0495949
antineoplastic-633273	mRNA	EDIL3	Expression	CellMiner	-	-	-0.41982	0.0372867
antineoplastic-641296	mRNA	EDIL3	Expression	CellMiner	-	-	-0.421317	0.0305491
AR-42	mRNA	EDIL3	CNV	GDSC	0.0790571	0.0429279	0.10007	0.00584996
AR-42	mRNA	EDIL3	Methylation	GDSC	-0.0822091	0.0321578	-	-
arnebin	mRNA	EDIL3	Expression	CellMiner	-0.377549	0.0279049	-0.403034	0.0376745
artesunate	mRNA	EDIL3	Expression	CellMiner	-	-	-0.396299	0.0360114
aspiculamycin hcl	mRNA	EDIL3	Expression	CellMiner	-	-	0.398994	0.0383922
at 116, benzylamine salt	mRNA	EDIL3	Methylation	CellMiner	-	-	-0.387178	0.0180803
AT-7519	mRNA	EDIL3	CNV	GDSC	0.0996254	0.0159071	0.10476	0.00802068
austocystin d	mRNA	EDIL3	Methylation	CellMiner	0.349091	0.0431303	-	-
Avagacestat	mRNA	EDIL3	CNV	GDSC	-	-	0.0993054	0.0459091
Avagacestat	mRNA	EDIL3	Expression	GDSC	0.0815597	0.037782	0.0911054	0.0194964
Avagacestat	mRNA	EDIL3	Methylation	GDSC	-0.104942	0.00734427	-0.0846905	0.0400275
Axitinib	mRNA	EDIL3	CNV	GDSC	0.0748861	0.0343298	0.0725635	0.0350166
azaserin	mRNA	EDIL3	Methylation	CellMiner	-	-	0.405158	0.0314316
AZD6482	mRNA	EDIL3	Expression	GDSC	-0.108103	0.00616431	-0.118303	0.00260197
AZD7762	mRNA	EDIL3	Methylation	GDSC	-	-	-0.0868591	0.0277778
AZD8055	mRNA	EDIL3	Expression	GDSC	0.0765812	0.0393897	0.0742426	0.046327
AZD8055	mRNA	EDIL3	Methylation	GDSC	-0.114152	0.0021964	-0.0875264	0.026631
BAY-61-3606	mRNA	EDIL3	CNV	GDSC	0.0923801	0.0075297	0.0939009	0.00693857
BAY-61-3606	mRNA	EDIL3	Methylation	GDSC	-0.105876	0.00502487	-0.100608	0.00785875
Belinostat	mRNA	EDIL3	CNV	GDSC	-	-	0.0923267	0.0147829
benzamide, 4-amino-n-(2-aminophenyl)-	mRNA	EDIL3	Expression	CellMiner	-0.414759	0.0480008	-	-
benzene, 1,1'-(1,2-ethanediyl)bis[2,5-dimethoxy-	mRNA	EDIL3	Expression	CellMiner	-	-	-0.391158	0.0382079
benzene, 1,1'-[(1,3-butadiene-1,4-diyl)sulfonyl]bis	mRNA	EDIL3	Expression	CellMiner	-0.401151	0.0313075	-0.412377	0.0418014
benzene, 1,1'-sulfonylbis(2-nitro-	mRNA	EDIL3	Expression	CellMiner	-	-	0.446561	0.0493965
benzofurazan, 4-nitro-7-(2-pyridinylthio)-, n-oxide	mRNA	EDIL3	Expression	CellMiner	-0.409221	0.0235365	-0.46045	0.0107264
benzoxazole, 2-[(1-methyl-4-nitro-1h-imidazol-5-yl)thio]-	mRNA	EDIL3	Expression	CellMiner	-0.396761	0.0337244	-0.453129	0.0160952
bipinnatin i	mRNA	EDIL3	Expression	CellMiner	-	-	-0.438324	0.0432841
bis(2-nitrophenyl)sulfilimine	mRNA	EDIL3	Expression	CellMiner	-0.429727	0.0210986	-0.475615	0.00983406
BIX02189	mRNA	EDIL3	CNV	GDSC	0.0944948	0.00529636	0.101764	0.00243076
Bleomycin	mRNA	EDIL3	Methylation	GDSC	-0.107495	0.0131111	-0.0956059	0.033769
Bleomycin (50 uM)	mRNA	EDIL3	Expression	GDSC	-0.116412	0.00114082	-0.167108	1.66846e-06
Bleomycin (50 uM)	mRNA	EDIL3	Methylation	GDSC	0.0867749	0.0316145	0.0858958	0.0309381
BMS-345541	mRNA	EDIL3	CNV	GDSC	0.115555	0.00252326	0.135147	0.000181929
bryodulcosigenin	mRNA	EDIL3	Expression	CellMiner	-	-	-0.463367	0.0167361
BX-912	mRNA	EDIL3	CNV	GDSC	0.113498	0.00150149	0.131453	0.000196374
BX-912	mRNA	EDIL3	Methylation	GDSC	-0.101096	0.00458875	-	-
BX795	mRNA	EDIL3	Expression	GDSC	-0.0940695	0.0146048	-0.136339	0.000255468
By-Product of CUDC-305	mRNA	EDIL3	Expression	CellMiner	-0.416332	0.0414037	-0.437059	0.0195547
Cabozantinib	mRNA	EDIL3	Methylation	GDSC	-0.100906	0.0077877	-	-
calycopterone	mRNA	EDIL3	Expression	CellMiner	-0.374709	0.0498534	-0.419189	0.0428604
caracemide	mRNA	EDIL3	Expression	CellMiner	-0.428508	0.00875544	-0.438662	0.0148789
Carboxyphthalatoplatinum	mRNA	EDIL3	Expression	CellMiner	-0.424561	0.0221121	-0.464715	0.012855
CAY10603	mRNA	EDIL3	CNV	GDSC	-	-	0.0917381	0.0095799
celcot rm	mRNA	EDIL3	Methylation	CellMiner	-0.342879	0.041076	-	-
chapliatrin	mRNA	EDIL3	Expression	CellMiner	-	-	-0.451422	0.0309905
CHIR-99021	mRNA	EDIL3	Methylation	GDSC	-0.0880147	0.0280728	-	-
chlorobisoximatobismuth(iii)-dihydrochloride	mRNA	EDIL3	Expression	CellMiner	-0.458775	0.00536845	-0.468879	0.00676698
chlorotris(chinoline-8-olato)titanium(iv)-trihydrochloride	mRNA	EDIL3	Expression	CellMiner	-	-	-0.402714	0.0243479
cis-7,9-diphenyl-3-methylene-1,8-dioxaspirodecan-2-one	mRNA	EDIL3	Expression	CellMiner	-0.395137	0.0285942	-0.41972	0.0336897
cis-dichlorobis(4-methoxyphenethylamine)platinum(ii)	mRNA	EDIL3	Expression	CellMiner	-	-	-0.379081	0.0388016
copper-elesclomol	mRNA	EDIL3	Expression	CellMiner	-0.458456	0.0296857	-0.540055	0.0100145
CP466722	mRNA	EDIL3	CNV	GDSC	0.0889321	0.013115	0.0832239	0.0181046
CP466722	mRNA	EDIL3	Expression	GDSC	0.0944395	0.00786539	-	-
CP466722	mRNA	EDIL3	Methylation	GDSC	-0.119771	0.000825747	-0.0919256	0.0127
CP724714	mRNA	EDIL3	Expression	GDSC	0.116646	0.00279942	0.0972261	0.00969863
crassin acetate	mRNA	EDIL3	Expression	CellMiner	-	-	-0.443018	0.0316126
CUDC-101	mRNA	EDIL3	CNV	GDSC	0.0963085	0.0174428	0.0996067	0.00973636
CUDC-101	mRNA	EDIL3	Methylation	GDSC	-0.0862839	0.023621	-	-
CX-5461	mRNA	EDIL3	Expression	GDSC	0.0860776	0.0149523	-	-
CX-5461	mRNA	EDIL3	Methylation	GDSC	-0.106608	0.00321145	-	-
cyanocycline a	mRNA	EDIL3	Expression	CellMiner	-	-	-0.443771	0.0268264
cycloalkannin	mRNA	EDIL3	Expression	CellMiner	-0.415453	0.0259722	-0.443793	0.027497
cyclohexanone, 2,6-bis(piperidinomethyl)-	mRNA	EDIL3	Expression	CellMiner	-0.388613	0.0413522	-0.457178	0.0209661
cyclopentanone, 2,5-bis[(trimethylamino)methyl]-, iodide	mRNA	EDIL3	Expression	CellMiner	-0.400375	0.0265999	-0.477229	0.0195272
Dabrafenib	mRNA	EDIL3	Methylation	GDSC	-0.0990693	0.0111438	-0.107368	0.00711468
Dacinostat	mRNA	EDIL3	Expression	GDSC	0.115222	0.00191256	0.0945917	0.0103769
Dacinostat	mRNA	EDIL3	Methylation	GDSC	-0.0905609	0.0218928	-0.0975031	0.013554
Dactolisib	mRNA	EDIL3	Expression	GDSC	-0.0946767	0.0199403	-0.105242	0.00984305
Daporinad	mRNA	EDIL3	CNV	GDSC	0.122745	0.000396945	0.134413	7.7365e-05
Daporinad	mRNA	EDIL3	Expression	GDSC	0.100777	0.00414907	-	-
dihydroartemisinyl ether, stereoisomer of nsc-685989	mRNA	EDIL3	Expression	CellMiner	-	-	-0.420819	0.0235239
diketocoriolin b	mRNA	EDIL3	Expression	CellMiner	-0.448805	0.00655592	-0.496881	0.00677641
Docetaxel	mRNA	EDIL3	Methylation	GDSC	0.106206	0.00582361	0.097554	0.0119124
EHT-1864	mRNA	EDIL3	Expression	GDSC	0.110353	0.00346671	0.0801388	0.0333544
Elesclomol	mRNA	EDIL3	Expression	GDSC	-0.0953605	0.0168172	-0.0889001	0.0293911
encelin	mRNA	EDIL3	Expression	CellMiner	-0.398144	0.0326414	-0.40082	0.0487419
enhydrin a	mRNA	EDIL3	Expression	CellMiner	-0.453608	0.0109215	-0.493977	0.00702715
eremantholide c	mRNA	EDIL3	Expression	CellMiner	-0.460807	0.0185194	-0.458422	0.0107906
eriocalyxin b	mRNA	EDIL3	Expression	CellMiner	-0.371813	0.0446445	-0.396388	0.0452503
eriolangin	mRNA	EDIL3	Expression	CellMiner	-	-	-0.38396	0.0385731
Erlotinib	mRNA	EDIL3	Mutation	CCLE	-	-	-	-
Etoposide	mRNA	EDIL3	CNV	GDSC	-	-	0.0744931	0.0449299
Etoposide	mRNA	EDIL3	Methylation	GDSC	-0.0802869	0.0395624	-0.0804198	0.0407185
eupachlorin	mRNA	EDIL3	Expression	CellMiner	-0.445596	0.0164981	-0.480619	0.0150331
eupacunoxin	mRNA	EDIL3	Expression	CellMiner	-0.384399	0.0493121	-	-
euparotin acetate	mRNA	EDIL3	Expression	CellMiner	-0.379859	0.0364296	-0.39447	0.0484647
eurecurvin	mRNA	EDIL3	Expression	CellMiner	-	-	-0.45715	0.0145767
excisanin b	mRNA	EDIL3	Expression	CellMiner	-	-	-0.439904	0.0357629
Fedratinib	mRNA	EDIL3	CNV	GDSC	0.0952546	0.00958817	0.0886859	0.0148245
Fedratinib	mRNA	EDIL3	Methylation	GDSC	-0.114747	0.00134126	-0.100567	0.00574198
Foretinib	mRNA	EDIL3	CNV	GDSC	0.0968337	0.00477887	-	-
FR-180204	mRNA	EDIL3	CNV	GDSC	0.0973883	0.0113207	0.0899488	0.0225933
gab-geldanamycin	mRNA	EDIL3	Expression	CellMiner	-0.38879	0.0207862	-0.466656	0.00879064
Gefitinib	mRNA	EDIL3	Expression	GDSC	0.101216	0.0143203	-	-
geldanamicin	mRNA	EDIL3	Expression	CellMiner	-0.391584	0.0398788	-0.457817	0.0143667
geldanamycin analog	mRNA	EDIL3	Expression	CellMiner	-	-	-0.385929	0.0496769
Genentech Cpd 10	mRNA	EDIL3	CNV	GDSC	0.10432	0.00467027	0.107994	0.00247292
gsk1030058a	mRNA	EDIL3	Expression	CellMiner	-	-	0.470729	0.0430259
GSK1070916	mRNA	EDIL3	Expression	GDSC	0.103169	0.00304845	-	-
GSK1070916	mRNA	EDIL3	Methylation	GDSC	-0.0817478	0.0232745	-	-
gsk2186269a	mRNA	EDIL3	Expression	CellMiner	-	-	-0.418008	0.0410169
gsk2213727a	mRNA	EDIL3	Expression	CellMiner	-	-	-0.424282	0.0266767
GSK269962A	mRNA	EDIL3	Expression	GDSC	-0.114807	0.00241872	-0.135096	0.000274671
gsk270822a	mRNA	EDIL3	Expression	CellMiner	0.454324	0.0283285	-	-
GSK429286A	mRNA	EDIL3	CNV	GDSC	0.0752888	0.040608	0.0917595	0.00849652
GSK690693	mRNA	EDIL3	CNV	GDSC	0.113732	0.00511121	0.126593	0.000610641
GSK690693	mRNA	EDIL3	Expression	GDSC	0.108606	0.00190447	-	-
gsk994854a	mRNA	EDIL3	Expression	CellMiner	-	-	-0.490384	0.0131527
GW-2580	mRNA	EDIL3	CNV	GDSC	0.0907551	0.0239598	0.0846339	0.0271907
GW-2580	mRNA	EDIL3	Methylation	GDSC	-0.0801371	0.0432103	-	-
h8631	mRNA	EDIL3	Expression	CellMiner	0.459516	0.0407067	-	-
heliangolide	mRNA	EDIL3	Expression	CellMiner	-0.421014	0.0244861	-0.47124	0.0189924
HG6-64-1	mRNA	EDIL3	Expression	GDSC	-0.0824234	0.0418027	-0.118754	0.00258261
HG6-64-1	mRNA	EDIL3	Methylation	GDSC	-0.0837222	0.0331085	-	-
hm-9-ao	mRNA	EDIL3	Expression	CellMiner	-0.387776	0.0342555	-0.442073	0.0256291
hydroxy at 125	mRNA	EDIL3	Methylation	CellMiner	-	-	0.457251	0.0281487
I-BET-762	mRNA	EDIL3	CNV	GDSC	0.103182	0.00521409	0.108134	0.00299743
I-BET-762	mRNA	EDIL3	Expression	GDSC	0.106395	0.00201308	0.0847787	0.0144421
imidazole, 1-(4-chlorophenyl)-4-(4-nitrophenyl)-	mRNA	EDIL3	Expression	CellMiner	-	-	0.476201	0.0107177
Inosine dialdehyde	mRNA	EDIL3	Expression	CellMiner	-0.384602	0.0272488	-0.420479	0.023462
IPA-3	mRNA	EDIL3	Methylation	GDSC	-0.116798	0.0013092	-0.100082	0.0069212
isonicotinonitrile, 2,3,5-trichloro-6-(methylsulfonyl)-	mRNA	EDIL3	Expression	CellMiner	-0.380219	0.048976	-	-
Ispinesib Mesylate	mRNA	EDIL3	Expression	GDSC	0.122702	0.00045384	0.0912893	0.0094566
Ispinesib Mesylate	mRNA	EDIL3	Methylation	GDSC	-0.11038	0.00265429	-0.0891204	0.018238
jatrophon	mRNA	EDIL3	Expression	CellMiner	-0.452964	0.0161569	-0.444488	0.0306718
JQ1	mRNA	EDIL3	Methylation	GDSC	-0.110017	0.00347386	-0.103456	0.00732372
JW-7-24-1	mRNA	EDIL3	Methylation	GDSC	-0.0963629	0.00787575	-0.0743038	0.0463428
kalamycin	mRNA	EDIL3	Expression	CellMiner	-	-	-0.481639	0.0194783
KIN001-236	mRNA	EDIL3	CNV	GDSC	0.10954	0.00288459	0.109014	0.00295079
KIN001-236	mRNA	EDIL3	Expression	GDSC	0.0972252	0.00510006	0.0784179	0.0247576
KIN001-244	mRNA	EDIL3	CNV	GDSC	0.114103	0.00110986	0.0950291	0.00549505
KIN001-244	mRNA	EDIL3	Expression	GDSC	-	-	0.0761236	0.0312216
KIN001-260	mRNA	EDIL3	CNV	GDSC	0.0990388	0.00404971	0.11015	0.00119743
KIN001-266	mRNA	EDIL3	Methylation	GDSC	-0.0919592	0.0212881	-0.0885875	0.0274582
KIN001-270	mRNA	EDIL3	CNV	GDSC	0.0778741	0.0282315	0.0831013	0.0169212
KIN001-270	mRNA	EDIL3	Methylation	GDSC	-0.0996497	0.00600421	-	-
L-685458	mRNA	EDIL3	Expression	CCLE	-	-	0.238854	0.00023988
L-685458	mRNA	EDIL3	Mutation	CCLE	-	-	-	-
l-cysteine analog	mRNA	EDIL3	Expression	CellMiner	-0.390171	0.0425378	-	-
Lapatinib	mRNA	EDIL3	Expression	CCLE	-	-	0.190838	0.0197393
Lapatinib	mRNA	EDIL3	Mutation	CCLE	-	-	-	-
LDK-378	mRNA	EDIL3	Expression	CellMiner	-	-	-0.432851	0.0234474
Lenalidomide	mRNA	EDIL3	CNV	GDSC	0.0990188	0.00794788	0.0946762	0.0123134
Lenalidomide	mRNA	EDIL3	Methylation	GDSC	-0.10213	0.00615221	-0.101394	0.00755513
Lestaurtinib	mRNA	EDIL3	CNV	GDSC	0.076747	0.0248796	-	-
Lestaurtinib	mRNA	EDIL3	Methylation	GDSC	-	-	-0.0874563	0.0266395
Linifanib	mRNA	EDIL3	CNV	GDSC	0.0907779	0.0128543	-	-
lychnopholide	mRNA	EDIL3	Expression	CellMiner	-0.418322	0.0246129	-0.397321	0.0317727
Macbecin II	mRNA	EDIL3	Expression	CellMiner	-	-	-0.362315	0.0453036
Masitinib	mRNA	EDIL3	CNV	GDSC	0.0810959	0.0202755	0.0790007	0.0224546
Masitinib	mRNA	EDIL3	Expression	GDSC	0.0723141	0.0441356	-	-
Masitinib	mRNA	EDIL3	Methylation	GDSC	-0.113323	0.00201149	-0.106371	0.00414387
melampodin b acetate	mRNA	EDIL3	Expression	CellMiner	-0.400615	0.0424696	-0.435616	0.0343705
melampodinin	mRNA	EDIL3	Expression	CellMiner	-0.401786	0.0205913	-0.427265	0.0170963
melisimplexin	mRNA	EDIL3	Expression	CellMiner	-	-	0.5423	0.00677689
Mercuric Chloride	mRNA	EDIL3	Expression	CellMiner	-	-	-0.417116	0.0441256
mercury, (p-dioxane-2,5-diyldimethylene)bis[(octanoyloxy)-	mRNA	EDIL3	Expression	CellMiner	-0.349241	0.0479424	-	-
methylundecylpiperidine, trans	mRNA	EDIL3	Expression	CellMiner	-0.433238	0.00626791	-0.467823	0.00573901
Mevastatin	mRNA	EDIL3	Expression	CellMiner	-	-	0.424792	0.0349944
mexicanin e	mRNA	EDIL3	Expression	CellMiner	-0.396854	0.036738	-0.431412	0.0231699
Mitomycin-C	mRNA	EDIL3	CNV	GDSC	-	-	0.0826711	0.0262383
Mitomycin-C	mRNA	EDIL3	Expression	GDSC	0.0924437	0.0434333	-	-
Mitomycin-C	mRNA	EDIL3	Methylation	GDSC	-0.0935873	0.0236871	-0.104989	0.0144539
Motesanib	mRNA	EDIL3	Expression	GDSC	-0.104142	0.0290001	-	-
mp 317	mRNA	EDIL3	Expression	CellMiner	-	-	-0.436237	0.0347869
MPS-1-IN-1	mRNA	EDIL3	CNV	GDSC	0.0917171	0.0137263	0.0871599	0.0191416
multistatin	mRNA	EDIL3	Expression	CellMiner	-	-	-0.44496	0.0446748
n-[1-(biphenyl-4-yl)ethyl]-3,4-dichlorobenzamide	mRNA	EDIL3	Expression	CellMiner	-	-	0.504809	0.0280384
n-acetylsulfanilyl chloride	mRNA	EDIL3	Expression	CellMiner	0.465	0.00760171	0.421515	0.0227786
nanaomycin	mRNA	EDIL3	Expression	CellMiner	-0.405008	0.0220475	-0.438797	0.0163087
naphthazarin	mRNA	EDIL3	Expression	CellMiner	-0.372769	0.0391027	-0.415856	0.0452167
naphtho[2,1-b]quinolizinium, 5-chloro-7-methyl- perchlorate	mRNA	EDIL3	Methylation	CellMiner	-0.370753	0.0206069	-0.34092	0.0422867
Navitoclax	mRNA	EDIL3	Expression	GDSC	0.117041	0.000739047	-	-
neplanocin a	mRNA	EDIL3	Expression	CellMiner	-0.383655	0.0307783	-0.478132	0.0134248
NG-25	mRNA	EDIL3	CNV	GDSC	0.110022	0.00113893	0.102022	0.00245013
NG-25	mRNA	EDIL3	Expression	GDSC	0.0810086	0.0222473	0.07163	0.0434471
niveusin a	mRNA	EDIL3	Expression	CellMiner	-0.382178	0.0421948	-	-
NPK76-II-72-1	mRNA	EDIL3	Expression	GDSC	0.122564	0.000345341	0.100517	0.00353948
NPK76-II-72-1	mRNA	EDIL3	Methylation	GDSC	-0.0957717	0.00793999	-	-
NSC-207895	mRNA	EDIL3	CNV	GDSC	0.0970676	0.0120914	0.09167	0.0159199
NSC-87877	mRNA	EDIL3	Expression	GDSC	0.101287	0.0166161	0.0911405	0.0178816
Nutlin-3	mRNA	EDIL3	Mutation	CCLE	-	-	-	-
NVP-BHG712	mRNA	EDIL3	CNV	GDSC	0.088364	0.0107103	0.0864285	0.0133476
Obatoclax Mesylate	mRNA	EDIL3	Methylation	GDSC	-0.111342	0.00395049	-0.126117	0.00110371
ochraceolide a	mRNA	EDIL3	Expression	CellMiner	-0.338166	0.0419041	-	-
Olaparib	mRNA	EDIL3	CNV	GDSC	0.0984516	0.00786698	0.0969189	0.00856158
olpizan	mRNA	EDIL3	Expression	CellMiner	-0.421938	0.0235733	-0.527932	0.00580654
Omipalisib	mRNA	EDIL3	Expression	GDSC	0.0794667	0.0345838	-	-
OSI-027	mRNA	EDIL3	CNV	GDSC	0.0783901	0.0380102	0.0818054	0.0219399
OSI-027	mRNA	EDIL3	Expression	GDSC	0.0755011	0.0363615	-	-
OSI-027	mRNA	EDIL3	Methylation	GDSC	-0.111155	0.00209847	-0.0922524	0.0118489
OSI-930	mRNA	EDIL3	Expression	GDSC	0.0993218	0.00435274	0.112355	0.00112237
OSU-03012	mRNA	EDIL3	Methylation	GDSC	-	-	-0.101755	0.00905477
ovatifolin acetate	mRNA	EDIL3	Expression	CellMiner	-	-	-0.417901	0.0398376
oxanosine	mRNA	EDIL3	Expression	CellMiner	-	-	-0.428784	0.0191498
oxin	mRNA	EDIL3	Expression	CellMiner	-0.465086	0.00545769	-0.476077	0.00737226
p-fuchsin	mRNA	EDIL3	Methylation	CellMiner	-0.358685	0.0300316	-0.389063	0.0103908
PAC-1	mRNA	EDIL3	Expression	GDSC	0.102447	0.00436469	-	-
Paclitaxel	mRNA	EDIL3	Expression	CCLE	-	-	0.170991	0.0225489
pada	mRNA	EDIL3	Expression	CellMiner	-0.39303	0.0394665	-0.395798	0.0415289
Panobinostat	mRNA	EDIL3	Expression	CCLE	-	-	0.340504	4.7594e-08
Pazopanib	mRNA	EDIL3	Expression	GDSC	-0.111072	0.00952716	-	-
PD-0332991	mRNA	EDIL3	Expression	CCLE	-	-	0.204744	0.00222171
PD-0332991	mRNA	EDIL3	Mutation	CCLE	-	-	-	-
Pelitinib	mRNA	EDIL3	Expression	GDSC	0.115034	0.00178506	0.0866681	0.0206041
pentalenolactone	mRNA	EDIL3	Methylation	CellMiner	-0.399202	0.0156478	-	-
pepleo	mRNA	EDIL3	Expression	CellMiner	0.467991	0.0419461	-	-
perezone	mRNA	EDIL3	Expression	CellMiner	-	-	-0.424014	0.0363939
PF-4708671	mRNA	EDIL3	Expression	GDSC	0.104903	0.0101468	-	-
PF-562271	mRNA	EDIL3	Methylation	GDSC	-0.0834087	0.0496137	-	-
PF2341066	mRNA	EDIL3	Expression	CCLE	-	-	0.233109	0.000573665
PFI-3	mRNA	EDIL3	CNV	GDSC	0.0724192	0.047881	-	-
PFI-3	mRNA	EDIL3	Expression	GDSC	0.0988954	0.00554617	-	-
PFI-3	mRNA	EDIL3	Methylation	GDSC	-0.103405	0.00489351	-0.0763556	0.0436673
PHA-665752	mRNA	EDIL3	Expression	CCLE	-	-	0.208787	0.00548977
PHA-665752	mRNA	EDIL3	Methylation	CCLE	-0.178696	0.0395494	-	-
PHA-665752	mRNA	EDIL3	Mutation	CCLE	-	-	-	-
PHA-793887	mRNA	EDIL3	CNV	GDSC	0.122104	0.00085915	0.123193	0.000779891
phomazarin	mRNA	EDIL3	Expression	CellMiner	0.460643	0.0120808	0.520158	0.00407882
PI-103	mRNA	EDIL3	CNV	GDSC	-	-	0.0864071	0.0241387
PI-103	mRNA	EDIL3	Methylation	GDSC	-0.0964376	0.00745802	-0.0795215	0.030259
PIK-93	mRNA	EDIL3	CNV	GDSC	0.097628	0.0106982	0.0905265	0.0147083
PIK-93	mRNA	EDIL3	Expression	GDSC	0.105255	0.0025098	0.0773222	0.028088
Piperlongumine	mRNA	EDIL3	Expression	GDSC	-0.0923209	0.0272106	-0.0841975	0.0444365
Pitavastatin calcium	mRNA	EDIL3	Expression	CellMiner	0.407304	0.048292	0.410576	0.034041
Ponatinib	mRNA	EDIL3	Methylation	GDSC	-0.121942	0.000783145	-0.0846072	0.0285378
propan-1-one, 2,3-dichloro-1,3-bis(4-methylphenyl)-	mRNA	EDIL3	Expression	CellMiner	-	-	-0.420418	0.0334048
propanenitrile, 2-chloro-3-(phenylsulfonyl)-	mRNA	EDIL3	Expression	CellMiner	-0.42038	0.026799	-0.457333	0.025186
propanethioamide, n-hydroxy-n-methyl-	mRNA	EDIL3	Expression	CellMiner	-0.439796	0.00716881	-0.398666	0.0245792
propanoic acid, 3-bromo-2-(bromomethyl)-, methyl ester	mRNA	EDIL3	Expression	CellMiner	-	-	-0.424187	0.0322061
propiophenone, 3-phenyl-3-piperidino-	mRNA	EDIL3	Expression	CellMiner	-0.363759	0.0319328	-	-
protein toxin a 23 - mw approx. 6700	mRNA	EDIL3	Methylation	CellMiner	-0.452936	0.00811258	-0.476439	0.00350917
protein toxin b 15 - mw approx 6700	mRNA	EDIL3	Methylation	CellMiner	-0.406019	0.0334422	-0.458303	0.00855526
protein toxin d 5 - mw approx 6700	mRNA	EDIL3	Methylation	CellMiner	-0.452508	0.00857705	-0.417314	0.013786
pyrethrosin	mRNA	EDIL3	Expression	CellMiner	-	-	-0.445896	0.0438742
pyrimidine, 2,4,5-trichloro-6-isopropyl-	mRNA	EDIL3	Expression	CellMiner	-	-	-0.425961	0.035138
QL-X-138	mRNA	EDIL3	CNV	GDSC	-	-	0.0790029	0.0252413
QL-X-138	mRNA	EDIL3	Methylation	GDSC	-0.101524	0.0050697	-	-
QL-XI-92	mRNA	EDIL3	CNV	GDSC	0.0874614	0.0113294	0.08322	0.0163311
QL-XI-92	mRNA	EDIL3	Methylation	GDSC	-0.12463	0.000437124	-	-
QL-XII-47	mRNA	EDIL3	Methylation	GDSC	-0.0933922	0.013513	-0.081015	0.03397
QS11	mRNA	EDIL3	Expression	GDSC	0.079599	0.0402616	0.0756207	0.0485748
QS11	mRNA	EDIL3	Methylation	GDSC	-0.0892881	0.032094	-0.0909152	0.0316146
Quizartinib	mRNA	EDIL3	CNV	GDSC	0.108222	0.00495046	0.112953	0.00245481
Quizartinib	mRNA	EDIL3	Expression	GDSC	0.0773576	0.0298095	0.081861	0.0186827
Quizartinib	mRNA	EDIL3	Methylation	GDSC	-0.0872147	0.019016	-	-
Refametinib	mRNA	EDIL3	CNV	GDSC	-	-	-0.124765	0.018248
Ribavirin	mRNA	EDIL3	Expression	CellMiner	-	-	-0.422844	0.0199299
rifamycin, 1,4-dideoxy-1,4-dihydro-1,4-dioxo-, 21-formate	mRNA	EDIL3	Expression	CellMiner	-0.352083	0.0465091	-	-
rifocin	mRNA	EDIL3	Expression	CellMiner	-0.434883	0.00791142	-0.435951	0.0111269
rTRAIL	mRNA	EDIL3	Methylation	GDSC	-0.111257	0.0219995	-0.140172	0.000993566
rustaiyan a	mRNA	EDIL3	Expression	CellMiner	-0.362455	0.0383997	-0.452775	0.0266991
Ruxolitinib	mRNA	EDIL3	Expression	GDSC	0.0804396	0.024043	0.0745766	0.034235
Ruxolitinib	mRNA	EDIL3	Methylation	GDSC	-0.123785	0.000591281	-	-
sangivamycin, 6-aminothio-	mRNA	EDIL3	Expression	CellMiner	-0.417325	0.0422548	-	-
SB505124	mRNA	EDIL3	CNV	GDSC	0.0780561	0.0244674	0.0719263	0.0361495
SB52334	mRNA	EDIL3	CNV	GDSC	0.106503	0.00635517	0.104662	0.00522914
SB52334	mRNA	EDIL3	Expression	GDSC	0.0853881	0.0205319	0.0998207	0.00539569
SB590885	mRNA	EDIL3	Expression	GDSC	0.117759	0.00260711	0.0809107	0.0406406
SB590885	mRNA	EDIL3	Methylation	GDSC	-0.124842	0.00142298	-0.118772	0.00266427
Selisistat	mRNA	EDIL3	Expression	GDSC	0.0824269	0.0215355	0.072732	0.0395564
Selisistat	mRNA	EDIL3	Methylation	GDSC	-0.0865106	0.0223531	-	-
Selumetinib	mRNA	EDIL3	Methylation	CellMiner	0.377115	0.0381012	-	-
Serdemetan	mRNA	EDIL3	Expression	GDSC	-	-	-0.0993675	0.0196668
SGC0946	mRNA	EDIL3	Expression	GDSC	0.0786384	0.030619	-	-
SGC0946	mRNA	EDIL3	Methylation	GDSC	-0.0884161	0.0215396	-	-
shikoccin	mRNA	EDIL3	Expression	CellMiner	-0.382671	0.0267755	-	-
SL0101	mRNA	EDIL3	Expression	GDSC	0.101981	0.00644396	-	-
SN-38	mRNA	EDIL3	CNV	GDSC	0.0837854	0.0125512	-	-
SNX-2112	mRNA	EDIL3	CNV	GDSC	0.0916643	0.00970592	0.0843656	0.0146012
SNX-2112	mRNA	EDIL3	Expression	GDSC	0.0736705	0.0430555	-	-
Sorafenib	mRNA	EDIL3	Expression	CCLE	-	-	0.22437	0.00161146
sri 1215	mRNA	EDIL3	Methylation	CellMiner	-	-	0.315637	0.030911
Staurosporine	mRNA	EDIL3	Expression	CellMiner	0.426195	0.0237547	0.399016	0.0351691
stereoisomer of 672120 (mw=262)	mRNA	EDIL3	Expression	CellMiner	-0.399061	0.023333	-0.464988	0.0130468
stereoisomer of nsc 674067-p	mRNA	EDIL3	Expression	CellMiner	-0.40693	0.0157999	-0.374135	0.038415
STF-62247	mRNA	EDIL3	CNV	GDSC	-	-	0.0728692	0.0388323
streptonigrin analog (meo-n3)	mRNA	EDIL3	Expression	CellMiner	-0.374839	0.0393261	-	-
Talazoparib	mRNA	EDIL3	Expression	GDSC	-	-	-0.107362	0.00900013
Tamoxifen	mRNA	EDIL3	Expression	CellMiner	-	-	-0.387567	0.048579
Tanespimycin	mRNA	EDIL3	CNV	GDSC	-	-	-0.131659	0.000577342
Tanespimycin	mRNA	EDIL3	Expression	GDSC	-0.0715337	0.0461496	-0.0748319	0.0343387
Temozolomide	mRNA	EDIL3	Expression	GDSC	0.0820494	0.0239361	-	-
tenulin	mRNA	EDIL3	Expression	CellMiner	-0.432461	0.0124947	-0.623155	0.000154966
tert-butyl-(2,4-dioxochroman-3-ylidene) methylcarbamate	mRNA	EDIL3	Expression	CellMiner	-	-	0.414126	0.0296972
tetrakis(8-chinolineolato)titanium(iv)-tetrahydrochloride	mRNA	EDIL3	Expression	CellMiner	-0.443796	0.0128932	-0.423403	0.02225
Tetraplatin	mRNA	EDIL3	Expression	CellMiner	-	-	-0.441697	0.0305721
thalphenine chloride	mRNA	EDIL3	Methylation	CellMiner	-	-	-0.449617	0.0402076
thiosangivamycin	mRNA	EDIL3	Expression	CellMiner	-0.443252	0.0273093	-0.513283	0.00421364
Thiram	mRNA	EDIL3	Expression	CellMiner	-	-	-0.388284	0.048936
thymidine, 5'-[(bromoacetyl)amino]-5'-deoxy-	mRNA	EDIL3	Expression	CellMiner	-	-	-0.393909	0.0492409
thymine, 1,3-bis[1,2-bis(ethoxycarbonyl)ethenyl]-	mRNA	EDIL3	Expression	CellMiner	-	-	-0.435308	0.0467771
THZ-2-102-1	mRNA	EDIL3	CNV	GDSC	0.121141	0.000905864	0.100142	0.00468565
THZ-2-102-1	mRNA	EDIL3	Expression	GDSC	0.122529	0.000478728	0.126009	0.000274163
Tipifarnib	mRNA	EDIL3	Methylation	GDSC	-0.0875536	0.0478442	-0.0963594	0.0291458
Tivozanib	mRNA	EDIL3	CNV	GDSC	0.0718292	0.0373144	0.0934153	0.00579627
Tivozanib	mRNA	EDIL3	Methylation	GDSC	-0.0932717	0.0110162	-	-
TL-1-85	mRNA	EDIL3	CNV	GDSC	0.080814	0.0178374	0.0776474	0.0219816
TL-2-105	mRNA	EDIL3	CNV	GDSC	0.0926907	0.0120236	0.115007	0.00131927
toxin .delta.53l	mRNA	EDIL3	Expression	CellMiner	0.359513	0.0449208	0.387838	0.0305108
TPCA-1	mRNA	EDIL3	CNV	GDSC	0.116923	0.000808328	0.108422	0.00146856
Tretinoin	mRNA	EDIL3	CNV	GDSC	0.121516	0.00152573	0.106799	0.00751489
Tretinoin	mRNA	EDIL3	Expression	GDSC	0.0744993	0.0450018	-	-
trichlorotris(4-vinylpyridine)ruthenium(iii)	mRNA	EDIL3	Expression	CellMiner	-0.425283	0.0486234	-	-
trichlorotris-3-(t-butyl)pyrazoleruthenium(iii)	mRNA	EDIL3	Expression	CellMiner	-0.40499	0.0102658	-0.465273	0.011037
Tubastatin A	mRNA	EDIL3	CNV	GDSC	0.112387	0.00184966	0.113603	0.00153834
Tubastatin A	mRNA	EDIL3	Expression	GDSC	0.0938422	0.00667589	-	-
Tubastatin A	mRNA	EDIL3	Methylation	GDSC	-0.123863	0.000471298	-0.0770554	0.0389751
UNC0638	mRNA	EDIL3	Methylation	GDSC	-0.0779911	0.0403564	-0.0796307	0.0374457
UNC1215	mRNA	EDIL3	CNV	GDSC	0.0798734	0.0373674	0.081367	0.0404833
UNC1215	mRNA	EDIL3	Expression	GDSC	0.0724229	0.042473	-	-
UNC1215	mRNA	EDIL3	Methylation	GDSC	-0.0874716	0.0177115	-	-
uracil, 1,3-bis[1,2-bis(ethoxycarbonyl)ethenyl]-	mRNA	EDIL3	Expression	CellMiner	-	-	-0.453306	0.0439829
usaf sn-31	mRNA	EDIL3	Expression	CellMiner	-0.45199	0.0261089	-0.534304	0.00353279
vanitile	mRNA	EDIL3	Expression	CellMiner	-	-	0.419759	0.0438929
varacin trifluoroacetate salt	mRNA	EDIL3	Expression	CellMiner	-	-	-0.404296	0.0420052
Veliparib	mRNA	EDIL3	CNV	GDSC	0.0792086	0.0303992	-	-
versimide	mRNA	EDIL3	Expression	CellMiner	-	-	-0.452118	0.0341096
vicenistatin	mRNA	EDIL3	Expression	CellMiner	-0.390995	0.0265395	-0.398794	0.0293139
Vismodegib	mRNA	EDIL3	CNV	GDSC	0.0974663	0.00595483	0.092323	0.00765028
VNLG/124	mRNA	EDIL3	CNV	GDSC	0.0798182	0.0322493	0.0749345	0.0437481
VNLG/124	mRNA	EDIL3	Expression	GDSC	0.0819469	0.0199392	-	-
VX-11e	mRNA	EDIL3	CNV	GDSC	-	-	0.0703491	0.0493793
VX-702	mRNA	EDIL3	Expression	GDSC	0.0771775	0.0328761	-	-
WHI-P97	mRNA	EDIL3	CNV	GDSC	0.0966964	0.0229324	-	-
WHI-P97	mRNA	EDIL3	Expression	GDSC	0.088961	0.0259707	-	-
withafastuosin d diacetate	mRNA	EDIL3	Expression	CellMiner	-0.38652	0.0188335	-0.438331	0.0108951
withaferin-a diacetate	mRNA	EDIL3	Expression	CellMiner	-0.408109	0.0141455	-0.419197	0.0195395
WZ3105	mRNA	EDIL3	CNV	GDSC	0.122485	0.003332	0.115209	0.00414925
xanthinin	mRNA	EDIL3	Expression	CellMiner	-0.418422	0.046508	-	-
XMD13-2	mRNA	EDIL3	CNV	GDSC	0.111684	0.00229066	0.111813	0.00208601
XMD13-2	mRNA	EDIL3	Expression	GDSC	0.104311	0.00262568	0.0776583	0.0262818
XMD13-2	mRNA	EDIL3	Methylation	GDSC	-0.115174	0.00125548	-	-
XMD14-99	mRNA	EDIL3	CNV	GDSC	0.105722	0.00239734	0.121862	0.000385612
XMD14-99	mRNA	EDIL3	Expression	GDSC	0.104522	0.00246669	0.0731269	0.0361091
XMD15-27	mRNA	EDIL3	CNV	GDSC	0.0800512	0.0239693	0.0895939	0.0109759
XMD15-27	mRNA	EDIL3	Methylation	GDSC	-0.117213	0.00109467	-0.0770348	0.0423941
Y-39983	mRNA	EDIL3	CNV	GDSC	0.0893616	0.0115484	0.0802033	0.022216
Y-39983	mRNA	EDIL3	Methylation	GDSC	-0.109299	0.002544	-	-
YM201636	mRNA	EDIL3	Expression	GDSC	0.118989	0.000648543	0.124287	0.000316796
YM201636	mRNA	EDIL3	Methylation	GDSC	-0.115609	0.00154003	-0.100456	0.00708219
zaluzanin c	mRNA	EDIL3	Expression	CellMiner	-	-	-0.405041	0.0470689
Zibotentan	mRNA	EDIL3	CNV	GDSC	-	-	0.07455	0.0414757
Zibotentan	mRNA	EDIL3	Expression	GDSC	0.0943405	0.00710749	0.0696898	0.0476541
Zibotentan	mRNA	EDIL3	Methylation	GDSC	-0.121827	0.000708113	-0.0794602	0.0349638
ZSTK474	mRNA	EDIL3	Expression	GDSC	0.103645	0.00363383	0.0774062	0.0336647
zuihonin a	mRNA	EDIL3	Expression	CellMiner	-	-	-0.376026	0.0470615
