# Supplementary material for: EDIL3 is a potential prognostic biomarker that correlates with immune infiltrates in gastric cancer
Source: PeerJ journal article supplement (doi:10.7717/peerj.15559), 2023-08-09

## RealBand Pre-stained Protein Marker，3 colors，Wide Range，5~245 kDa

| Storage | -20°C |
| --- | --- |
| Categories | Protein Markers |

| Cat NO. | Package |
| --- | --- |
| [C610016-0001](http://www.life-biotech.com/product/productDetailForEN.html?productID=204296&sumProductID=204296) | 4 X 250 UL |


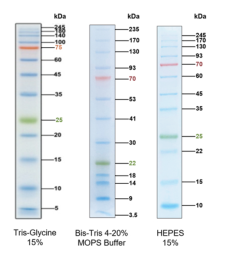

Supplement: Uncropped_Blots_Picture.zip [file Uncropped_Blots_Picture.zip]
